# Supplementary material for: Identification of DNA Damage Repair-Associated Prognostic Biomarkers for Prostate Cancer Using Transcriptomic Data Analysis
Source: MDPI journal article supplement (doi:10.3390/ijms222111771), 2021-10-29
Supplement: s1 [file s1]

## Supplementary materials

**Pai-Chi Teng**<sup>1</sup>, **Shu-Pin Huang**<sup>2,3,4,5</sup>, **Chia-Hsin Liu**<sup>6</sup>, **Ting-Yi Lin**<sup>7</sup>, **Yi-Chun Cho**<sup>6</sup>, **Yo-Liang Lai**<sup>8,9</sup>, **Shu-Chi Wang**<sup>10</sup>, **Hsin-Chih Yeh**<sup>2,11</sup>, **Chih-Pin Chuu**<sup>12</sup>, **Deng-Neng Chen**<sup>12</sup>, **Wei-Chung Cheng**<sup>6,8,13,\*</sup> and **Chia-Yang Li**<sup>14,\*</sup>

- <sup>1</sup> Taipei City Hospital Renai Branch, Taipei 10629, Taiwan; paichi.teng@gmail.com
- <sup>2</sup> Department of Urology, School of Medicine, College of Medicine, Kaohsiung Medical University, Kaohsiung 80708, Taiwan; shpihu73@gmail.com (S.-P.H.); patrick1201.tw@yahoo.com.tw (H.-C.Y.)
- <sup>3</sup> Department of Urology, Kaohsiung Medical University Hospital, Kaohsiung Medical University, Kaohsiung 80708, Taiwan
- <sup>4</sup> Graduate Institute of Clinical Medicine, College of Medicine, Kaohsiung Medical University, Kaohsiung 80708, Taiwan
- <sup>5</sup> Ph.D. Program in Environmental and Occupational Medicine, College of Medicine, Kaohsiung Medical University, Kaohsiung 80708, Taiwan
- <sup>6</sup> Research Center for Cancer Biology, China Medical University, Taichung 40403, Taiwan; b881642@gmail.com (C.-H.L.); demicho.0111@gmail.com (Y.-C.C.)
- <sup>7</sup> Department of Medical Research, Taipei Veterans General Hospital, Taipei 11217, Taiwan; lintingyi2014@gmail.com
- <sup>8</sup> Graduate Institute of Biomedical Science, China Medical University, Taichung 40403, Taiwan; yolianglai@gmail.com
- <sup>9</sup> Department of Radiation Oncology, China Medical University Hospital, Taichung 40403, Taiwan
- <sup>10</sup> Department of Medical Laboratory Science and Biotechnology, Kaohsiung Medical University, Kaohsiung 80708, Taiwan; shuchiwang@kmu.edu.tw
- <sup>11</sup> Department of Urology, Kaohsiung Municipal Ta-Tung Hospital, Kaohsiung 80145, Taiwan; patrick1201.tw@yahoo.com.tw
- <sup>12</sup> Institute of Cellular and System Medicine, National Health Research Institutes, Miaoli 350401, Taiwan; cpchuu@nhri.edu.tw
- <sup>13</sup> Department Management Information Systems, National Pingtung University of Science and Technology, Pingtung 912301, Taiwan; dnchen@mail.npust.edu.tw
- <sup>14</sup> Ph.D. Program for Cancer Biology and Drug Discovery, China Medical University and Academia Sinica, Taichung 40403, Taiwan
- <sup>14</sup> Graduate Institute of Medicine, College of Medicine, Kaohsiung Medical University, Kaohsiung 80708, Taiwan
- \* Correspondence: shpihu73@gmail.com (S.-P.H.); wccheng@mail.cmu.edu.tw (W.-C.C.); chiayangli@kmu.edu.tw (C.-Y.L.)

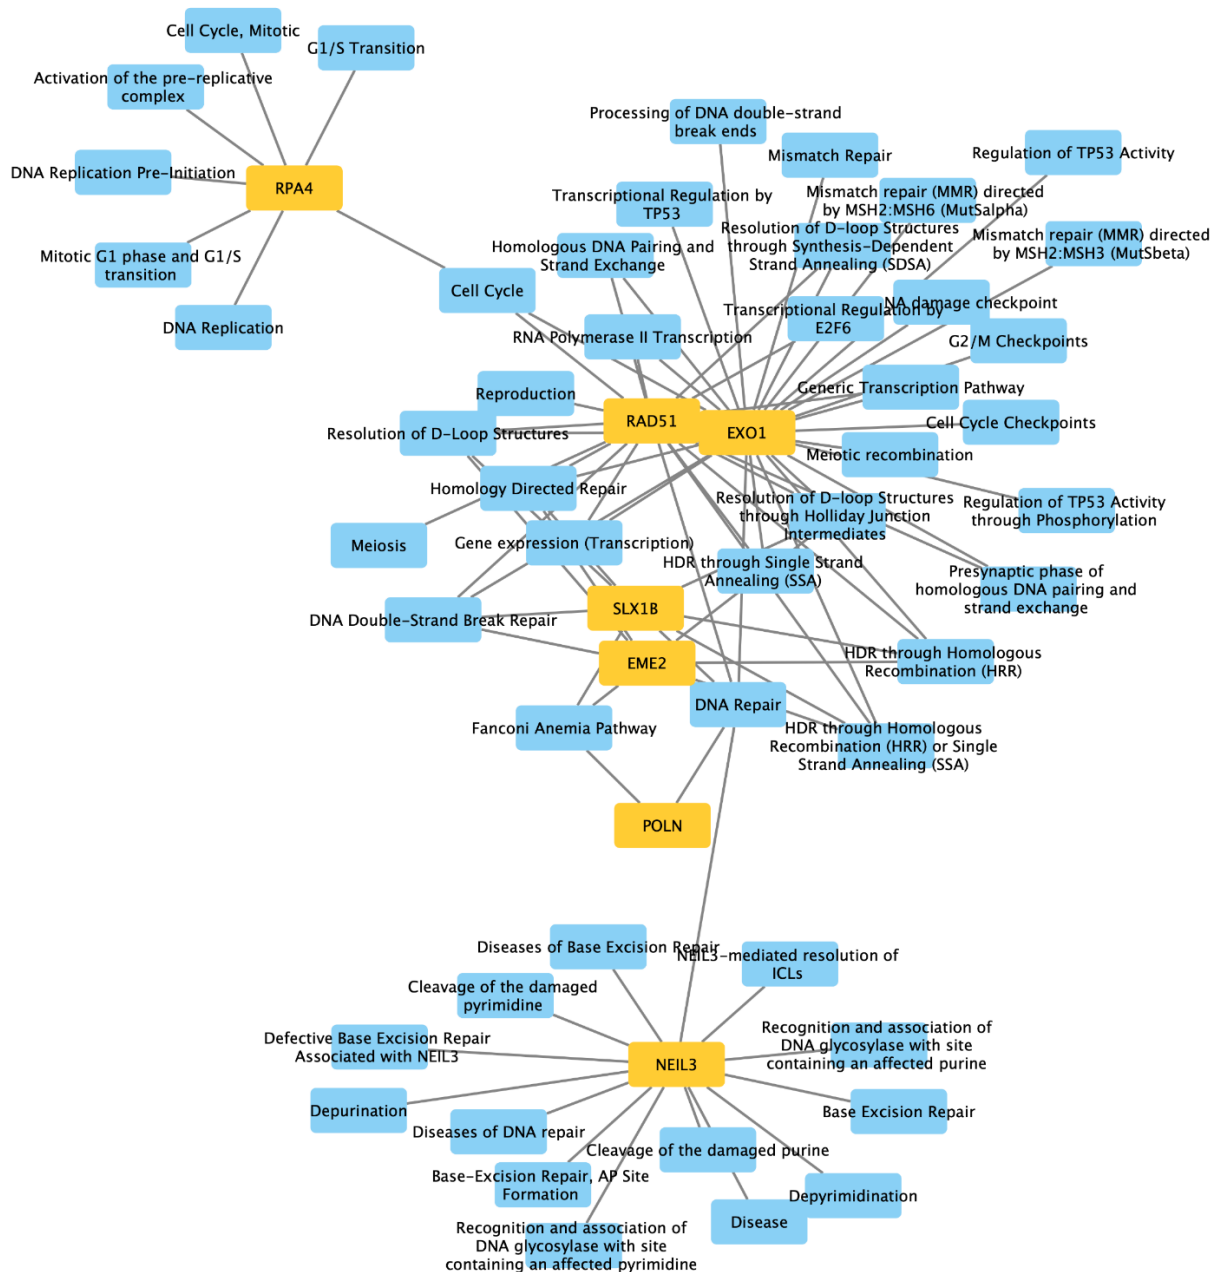

**Supplementary Figure S1.** Functional annotation of the 8 SDE genes based on Reactome.

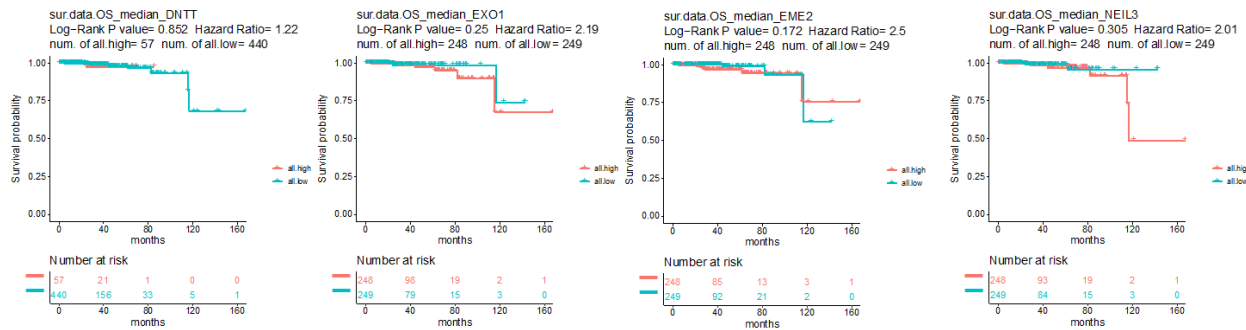

**Supplementary Figure S2.** Kaplan-Meier plot of OS for individual genes.

**Supplementary Table S1.** Six DNA-repair relevant pathways and genes.

| KEGG pathway entry | KEGG pathway name                                 | Link                                                                                                                              |
|--------------------|---------------------------------------------------|-----------------------------------------------------------------------------------------------------------------------------------|
| hsa03410           | Base excision repair - Homo sapiens (human)       | <a href="https://www.genome.jp/dbget-bin/www_bget?pathway:hsa03410">https://www.genome.jp/dbget-bin/www_bget?pathway:hsa03410</a> |
| hsa03420           | Nucleotide excision repair - Homo sapiens (human) | <a href="https://www.genome.jp/dbget-bin/www_bget?pathway:hsa03420">https://www.genome.jp/dbget-bin/www_bget?pathway:hsa03420</a> |
| hsa03430           | Mismatch repair - Homo sapiens (human)            | <a href="https://www.genome.jp/dbget-bin/www_bget?pathway:hsa03430">https://www.genome.jp/dbget-bin/www_bget?pathway:hsa03430</a> |
| hsa03440           | Homologous recombination - Homo sapiens (human)   | <a href="https://www.genome.jp/dbget-bin/www_bget?pathway:hsa03440">https://www.genome.jp/dbget-bin/www_bget?pathway:hsa03440</a> |
| hsa03450           | Non-homologous end-joining - Homo sapiens (human) | <a href="https://www.genome.jp/dbget-bin/www_bget?pathway:hsa03450">https://www.genome.jp/dbget-bin/www_bget?pathway:hsa03450</a> |
| hsa03460           | Fanconi anemia pathway - Homo sapiens (human)     | <a href="https://www.genome.jp/dbget-bin/www_bget?pathway:hsa03460">https://www.genome.jp/dbget-bin/www_bget?pathway:hsa03460</a> |

| KEGG Gene entry | Gene Symbol | KEGG Gene Description                                                 |
|-----------------|-------------|-----------------------------------------------------------------------|
| 10038           | PARP2       | poly(ADP-ribose) polymerase 2 [KO:K10798] [EC:2.4.2.30]               |
| 10039           | PARP3       | poly(ADP-ribose) polymerase family member 3 [KO:K10798] [EC:2.4.2.30] |
| 100526739       | CENPS-CORT  | CENPS-CORT readthrough [KO:K11511]                                    |
| 100533467       | BIVM-ERCC5  | BIVM-ERCC5 readthrough [KO:K10846]                                    |
| 10111           | RAD50       | RAD50 double strand break repair protein [KO:K10866] [EC:3.6.-.-]     |
| 1022            | CDK7        | cyclin dependent kinase 7 [KO:K02202] [EC:2.7.11.22 2.7.11.23]        |
| 1069            | CETN2       | centrin 2 [KO:K10840]                                                 |
| 10714           | POLD3       | DNA polymerase delta 3, accessory subunit [KO:K03504]                 |

|        |        |                                                                                          |
|--------|--------|------------------------------------------------------------------------------------------|
| 11073  | TOPBP1 | DNA topoisomerase II binding protein 1 [KO:K10728]                                       |
| 11201  | POL1   | DNA polymerase iota [KO:K03510] [EC:2.7.7.7]                                             |
| 116028 | RMI2   | RecQ mediated genome instability 2 [KO:K15365]                                           |
| 1161   | ERCC8  | ERCC excision repair 8, CSA ubiquitin ligase complex subunit [KO:K10570]                 |
| 142    | PARP1  | poly(ADP-ribose) polymerase 1 [KO:K24070] [EC:2.4.2.30]                                  |
| 143    | PARP4  | poly(ADP-ribose) polymerase family member 4 [KO:K10798] [EC:2.4.2.30]                    |
| 146956 | EME1   | essential meiotic structure-specific endonuclease 1 [KO:K10882] [EC:3.1.22.-]            |
| 1642   | DDB1   | damage specific DNA binding protein 1 [KO:K10610]                                        |
| 1643   | DDB2   | damage specific DNA binding protein 2 [KO:K10140]                                        |
| 1791   | DNTT   | DNA nucleotidylexotransferase [KO:K00977] [EC:2.7.7.31]                                  |
| 197342 | EME2   | essential meiotic structure-specific endonuclease subunit 2 [KO:K10883]                  |
| 201254 | CENPX  | centromere protein X [KO:K15360]                                                         |
| 2067   | ERCC1  | ERCC excision repair 1, endonuclease non-catalytic subunit [KO:K10849]                   |
| 2068   | ERCC2  | ERCC excision repair 2, TFIIH core complex helicase subunit [KO:K10844] [EC:3.6.4.12]    |
| 2071   | ERCC3  | ERCC excision repair 3, TFIIH core complex helicase subunit [KO:K10843] [EC:3.6.4.12]    |
| 2072   | ERCC4  | ERCC excision repair 4, endonuclease catalytic subunit [KO:K10848] [EC:3.1.-.-]          |
| 2073   | ERCC5  | ERCC excision repair 5, endonuclease [KO:K10846]                                         |
| 2074   | ERCC6  | ERCC excision repair 6, chromatin remodeling factor [KO:K10841]                          |
| 2175   | FANCA  | FA complementation group A [KO:K10888]                                                   |
| 2176   | FANCC  | FA complementation group C [KO:K10890]                                                   |
| 2177   | FANCD2 | FA complementation group D2 [KO:K10891]                                                  |
| 2178   | FANCE  | FA complementation group E [KO:K10892]                                                   |
| 2187   | FANCB  | FA complementation group B [KO:K10889]                                                   |
| 2188   | FANCF  | FA complementation group F [KO:K10893]                                                   |
| 2189   | FANCG  | FA complementation group G [KO:K10894]                                                   |
| 2237   | FEN1   | flap structure-specific endonuclease 1 [KO:K04799] [EC:3.-.-.]                           |
| 22909  | FAN1   | FANCD2 and FANCI associated nuclease 1 [KO:K15363] [EC:3.1.21.- 3.1.4.1]                 |
| 23583  | SMUG1  | single-strand-selective monofunctional uracil-DNA glycosylase 1 [KO:K10800] [EC:3.2.2.-] |

|        |        |                                                                            |
|--------|--------|----------------------------------------------------------------------------|
| 252969 | NEIL2  | nei like DNA glycosylase 2 [KO:K10568]<br>[EC:3.2.2.- 4.2.99.18]           |
| 2547   | XRCC6  | X-ray repair cross complementing 6 [KO:K10884]                             |
| 25788  | RAD54B | RAD54 homolog B [KO:K10877] [EC:3.6.4.-]                                   |
| 27030  | MLH3   | mutL homolog 3 [KO:K08739]                                                 |
| 27301  | APEX2  | apurinic/aprimidinic endodeoxyribonuclease 2<br>[KO:K10772] [EC:4.2.99.18] |
| 27343  | POLL   | DNA polymerase lambda [KO:K03512]<br>[EC:2.7.7.7 4.2.99.-]                 |
| 27434  | POLM   | DNA polymerase mu [KO:K03513] [EC:2.7.7.7]                                 |
| 29086  | BABAM1 | BRISC and BRCA1 A complex member 1<br>[KO:K20776]                          |
| 29089  | UBE2T  | ubiquitin conjugating enzyme E2 T [KO:K13960]<br>[EC:2.3.2.23]             |
| 2956   | MSH6   | mutS homolog 6 [KO:K08737]                                                 |
| 2965   | GTF2H1 | general transcription factor IIH subunit 1<br>[KO:K03141]                  |
| 2966   | GTF2H2 | general transcription factor IIH subunit 2<br>[KO:K03142]                  |
| 2967   | GTF2H3 | general transcription factor IIH subunit 3<br>[KO:K03143]                  |
| 2968   | GTF2H4 | general transcription factor IIH subunit 4<br>[KO:K03144]                  |
| 29935  | RPA4   | replication protein A4 [KO:K10741]                                         |
| 3146   | HMGB1  | high mobility group box 1 [KO:K10802]                                      |
| 328    | APEX1  | apurinic/aprimidinic endodeoxyribonuclease 1<br>[KO:K10771] [EC:4.2.99.18] |
| 3280   | HES1   | hes family bHLH transcription factor 1 [KO:K06054]                         |
| 353497 | POLN   | DNA polymerase nu [KO:K16618] [EC:2.7.7.7]                                 |
| 378708 | CENPS  | centromere protein S [KO:K11511]                                           |
| 3978   | LIG1   | DNA ligase 1 [KO:K10747]<br>[EC:6.5.1.1 6.5.1.6 6.5.1.7]                   |
| 3980   | LIG3   | DNA ligase 3 [KO:K10776] [EC:6.5.1.1]                                      |
| 3981   | LIG4   | DNA ligase 4 [KO:K10777] [EC:6.5.1.1]                                      |
| 404672 | GTF2H5 | general transcription factor IIH subunit 5<br>[KO:K10845]                  |
| 4292   | MLH1   | mutL homolog 1 [KO:K08734]                                                 |
| 4331   | MNAT1  | MNAT1 component of CDK activating kinase<br>[KO:K10842]                    |
| 4350   | MPG    | N-methylpurine DNA glycosylase [KO:K03652]<br>[EC:3.2.2.21]                |
| 4361   | MRE11  | MRE11 homolog, double strand break repair nuclease<br>[KO:K10865]          |
| 4436   | MSH2   | mutS homolog 2 [KO:K08735]                                                 |
| 4437   | MSH3   | mutS homolog 3 [KO:K08736]                                                 |

|        |       |                                                                                  |
|--------|-------|----------------------------------------------------------------------------------|
| 4595   | MUTYH | mutY DNA glycosylase [KO:K03575] [EC:3.2.2.31]                                   |
| 4683   | NBN   | nibrin [KO:K10867]                                                               |
| 472    | ATM   | ATM serine/threonine kinase [KO:K04728] [EC:2.7.11.1]                            |
| 4913   | NTHL1 | nth like DNA glycosylase 1 [KO:K10773] [EC:4.2.99.18]                            |
| 4968   | OGG1  | 8-oxoguanine DNA glycosylase [KO:K03660] [EC:3.2.2.- 4.2.99.18]                  |
| 50511  | SYCP3 | synaptonemal complex protein 3 [KO:K19528]                                       |
| 5111   | PCNA  | proliferating cell nuclear antigen [KO:K04802]                                   |
| 51426  | POLK  | DNA polymerase kappa [KO:K03511] [EC:2.7.7.7]                                    |
| 51455  | REV1  | REV1 DNA directed polymerase [KO:K03515] [EC:2.7.7.-]                            |
| 51720  | UIMC1 | ubiquitin interaction motif containing 1 [KO:K20775]                             |
| 5395   | PMS2  | PMS1 homolog 2, mismatch repair system component [KO:K10858]                     |
| 54107  | POLE3 | DNA polymerase epsilon 3, accessory subunit [KO:K02326] [EC:2.7.7.7]             |
| 5423   | POLB  | DNA polymerase beta [KO:K02330] [EC:2.7.7.7 4.2.99.-]                            |
| 5424   | POLD1 | DNA polymerase delta 1, catalytic subunit [KO:K02327] [EC:2.7.7.7]               |
| 5425   | POLD2 | DNA polymerase delta 2, accessory subunit [KO:K02328]                            |
| 5426   | POLE  | DNA polymerase epsilon, catalytic subunit [KO:K02324] [EC:2.7.7.7]               |
| 5427   | POLE2 | DNA polymerase epsilon 2, accessory subunit [KO:K02325] [EC:2.7.7.7]             |
| 5429   | POLH  | DNA polymerase eta [KO:K03509] [EC:2.7.7.7]                                      |
| 545    | ATR   | ATR serine/threonine kinase [KO:K06640] [EC:2.7.11.1]                            |
| 548593 | SLX1A | SLX1 homolog A, structure-specific endonuclease subunit [KO:K15078] [EC:3.6.1.-] |
| 55120  | FANCL | FA complementation group L [KO:K10606] [EC:2.3.2.27]                             |
| 55215  | FANCI | FA complementation group I [KO:K10895]                                           |
| 55247  | NEIL3 | nei like DNA glycosylase 3 [KO:K10569]                                           |
| 5591   | PRKDC | protein kinase, DNA-activated, catalytic subunit [KO:K06642] [EC:2.7.11.1]       |
| 56655  | POLE4 | DNA polymerase epsilon 4, accessory subunit [KO:K03506] [EC:2.7.7.7]             |
| 57599  | WDR48 | WD repeat domain 48 [KO:K15361]                                                  |
| 57697  | FANCM | FA complementation group M [KO:K10896]                                           |
| 57804  | POLD4 | DNA polymerase delta 4, accessory subunit [KO:K03505]                            |
| 580    | BARD1 | BRCA1 associated RING domain 1 [KO:K10683]                                       |

|        |           |                                                                                    |
|--------|-----------|------------------------------------------------------------------------------------|
| 5886   | RAD23A    | RAD23 homolog A, nucleotide excision repair protein [KO:K10839]                    |
| 5887   | RAD23B    | RAD23 homolog B, nucleotide excision repair protein [KO:K10839]                    |
| 5888   | RAD51     | RAD51 recombinase [KO:K04482]                                                      |
| 5889   | RAD51C    | RAD51 paralog C [KO:K10870]                                                        |
| 5890   | RAD51B    | RAD51 paralog B [KO:K10869]                                                        |
| 5892   | RAD51D    | RAD51 paralog D [KO:K10871]                                                        |
| 5893   | RAD52     | RAD52 homolog, DNA repair protein [KO:K10873]                                      |
| 5932   | RBBP8     | RB binding protein 8, endonuclease [KO:K20773] [EC:3.1.-.-]                        |
| 5980   | REV3L     | REV3 like, DNA directed polymerase zeta catalytic subunit [KO:K02350] [EC:2.7.7.7] |
| 5981   | RFC1      | replication factor C subunit 1 [KO:K10754]                                         |
| 5982   | RFC2      | replication factor C subunit 2 [KO:K10755]                                         |
| 5983   | RFC3      | replication factor C subunit 3 [KO:K10756]                                         |
| 5984   | RFC4      | replication factor C subunit 4 [KO:K10755]                                         |
| 5985   | RFC5      | replication factor C subunit 5 [KO:K10756]                                         |
| 6117   | RPA1      | replication protein A1 [KO:K07466]                                                 |
| 6118   | RPA2      | replication protein A2 [KO:K10739]                                                 |
| 6119   | RPA3      | replication protein A3 [KO:K10740]                                                 |
| 641    | BLM       | BLM RecQ like helicase [KO:K10901] [EC:3.6.4.12]                                   |
| 64421  | DCLRE1C   | DNA cross-link repair 1C [KO:K10887] [EC:3.1.-.-]                                  |
| 672    | BRCA1     | BRCA1 DNA repair associated [KO:K10605] [EC:2.3.2.27]                              |
| 6742   | SSBP1     | single stranded DNA binding protein 1 [KO:K03111]                                  |
| 675    | BRCA2     | BRCA2 DNA repair associated [KO:K08775]                                            |
| 6996   | TDG       | thymine DNA glycosylase [KO:K20813] [EC:3.2.2.29]                                  |
| 7156   | TOP3A     | DNA topoisomerase III alpha [KO:K03165] [EC:5.6.2.1]                               |
| 728340 | GTF2H2C   | GTF2H2 family member C [KO:K03142]                                                 |
| 730394 | GTF2H2C_2 | GTF2H2 family member C, copy 2 [KO:K03142]                                         |
| 7374   | UNG       | uracil DNA glycosylase [KO:K03648] [EC:3.2.2.27]                                   |
| 7398   | USP1      | ubiquitin specific peptidase 1 [KO:K11832] [EC:3.4.19.12]                          |
| 7507   | XPA       | XPA, DNA damage recognition and repair factor [KO:K10847]                          |
| 7508   | XPC       | XPC complex subunit, DNA damage recognition and repair factor [KO:K10838]          |
| 7515   | XRCC1     | X-ray repair cross complementing 1 [KO:K10803]                                     |
| 7516   | XRCC2     | X-ray repair cross complementing 2 [KO:K10879]                                     |
| 7517   | XRCC3     | X-ray repair cross complementing 3 [KO:K10880]                                     |

|       |          |                                                                                  |
|-------|----------|----------------------------------------------------------------------------------|
| 7518  | XRCC4    | X-ray repair cross complementing 4 [KO:K10886]                                   |
| 7520  | XRCC5    | X-ray repair cross complementing 5 [KO:K10885]                                   |
| 79008 | SLX1B    | SLX1 homolog B, structure-specific endonuclease subunit [KO:K15078] [EC:3.6.1.-] |
| 79184 | BRCC3    | BRCA1/BRCA2-containing complex subunit 3 [KO:K11864] [EC:3.4.19.-]               |
| 79661 | NEIL1    | nei like DNA glycosylase 1 [KO:K10567] [EC:3.2.2.- 4.2.99.18]                    |
| 79728 | PALB2    | partner and localizer of BRCA2 [KO:K10897]                                       |
| 7979  | SEM1     | SEM1 26S proteasome subunit [KO:K10881]                                          |
| 79840 | NHEJ1    | non-homologous end joining factor 1 [KO:K10980]                                  |
| 80010 | RMI1     | RecQ mediated genome instability 1 [KO:K10990]                                   |
| 80198 | MUS81    | MUS81 structure-specific endonuclease subunit [KO:K08991] [EC:3.1.22.-]          |
| 80233 | FAAP100  | FA core complex associated protein 100 [KO:K10993]                               |
| 83990 | BRIP1    | BRCA1 interacting helicase 1 [KO:K15362] [EC:3.6.4.12]                           |
| 84126 | ATRIP    | ATR interacting protein [KO:K10905]                                              |
| 84142 | ABRAXAS1 | abraxas 1, BRCA1 A complex subunit [KO:K20774]                                   |
| 8438  | RAD54L   | RAD54 like [KO:K10875] [EC:3.6.4.-]                                              |
| 84464 | SLX4     | SLX4 structure-specific endonuclease subunit [KO:K10484]                         |
| 8450  | CUL4B    | cullin 4B [KO:K10609]                                                            |
| 8451  | CUL4A    | cullin 4A [KO:K10609]                                                            |
| 8930  | MBD4     | methyl-CpG binding domain 4, DNA glycosylase [KO:K10801] [EC:3.2.2.-]            |
| 8940  | TOP3B    | DNA topoisomerase III beta [KO:K03165] [EC:5.6.2.1]                              |
| 902   | CCNH     | cyclin H [KO:K06634]                                                             |
| 91442 | FAAP24   | FA core complex associated protein 24 [KO:K10898]                                |
| 9156  | EXO1     | exonuclease 1 [KO:K10746] [EC:3.1.-.-]                                           |
| 9577  | BABAM2   | BRISC and BRCA1 A complex member 2 [KO:K12173]                                   |
| 9894  | TELO2    | telomere maintenance 2 [KO:K11137]                                               |
| 9978  | RBX1     | ring-box 1 [KO:K03868] [EC:2.3.2.32]                                             |



**Supplementary Table S2.** Patient characteristics.

|                           |       |
|---------------------------|-------|
| <b>Number of patients</b> | 497   |
| <b>Age (year)</b>         |       |
| Mean                      | 61.61 |
| standard deviation        | 6.79  |
| <b>Gleason scores</b>     |       |
| 6                         | 45    |
| 7                         | 247   |
| 8                         | 64    |
| 9                         | 137   |
| 10                        | 4     |
| <b>TNM stage</b>          |       |
| T1N0M0 or T2N0M0          | 252   |
| others                    | 245   |
